# Supplementary material for: Optimization of reaction parameters for the synthesis of natural aroma esters by factorial design
Source: Royal Society of Chemistry journal article supplement (doi:10.1039/d4re00265b), 2024-01-01
Supplement: d4re00265b1.pdf [file d4re00265b1.pdf]

1 **Optimization of Reaction Parameters for Natural Aroma Esters Synthesis**  
2 **by Factorial Design**

3 Adrian I. Dudu<sup>†</sup>, Csaba Paizs<sup>†</sup>, Monica I. Toşa<sup>\*, †</sup>

4 <sup>†</sup> - Enzymology and Applied Biocatalysis Research Center, Faculty of Chemistry and  
5 Chemical Engineering, Babeş-Bolyai University, Arany Janos street, no. 11, 400028, Cluj  
6 Napoca, Romania.

7 Authors mailing addresses: Adrian I. Dudu: [adrian.dudu@ubbcluj.ro](mailto:adrian.dudu@ubbcluj.ro); Csaba Paizs:  
8 [csaba.paizs@ubbcluj.ro](mailto:csaba.paizs@ubbcluj.ro); Monica I. Toşa: [monica.tosa@ubbcluj.ro](mailto:monica.tosa@ubbcluj.ro)

9 \* Corresponding author: [monica.tosa@ubbcluj.ro](mailto:monica.tosa@ubbcluj.ro)

10

11

12

13

14 **ELECTRONIC SUPPORTING INFORMATION**

15

16

17

18

19

20

21

22

23

24

25

26

27

28

29

30

31

### 32 Chromatographic analysis of the esterification products

33 The oven programs, retention times and relative response factors (RRF) for the investigated  
34 compounds can be found in **Table S1**. Chromatographic separation of the starting alcohols  
35 and the corresponding esters can be found in **Figure S1-S7**.

36 **Table S1**. Chromatographic separation conditions for the esters of interest and the corresponding relative  
37 response factors at 160°C.

| <i>Compound name</i>       | <i>Retention time [min]</i> | <i>Relative response factor</i> |
|----------------------------|-----------------------------|---------------------------------|
| <i>Anisyl propionate</i>   | 8.7                         | 1.2288                          |
| <i>Anisyl butyrate</i>     | 11.8                        | 1.4951                          |
| <i>Cinnamyl propionate</i> | 10.1                        | 0.6128                          |
| <i>Cinnamyl butyrate</i>   | 14.1                        | 1.2371                          |
| <i>Benzyl propionate</i>   | 4.0                         | 1.0324                          |
| <i>Benzyl butyrate</i>     | 5.0                         | 0.7738                          |
| <i>Benzyl hexanoate</i>    | 9.3                         | 1.0646                          |

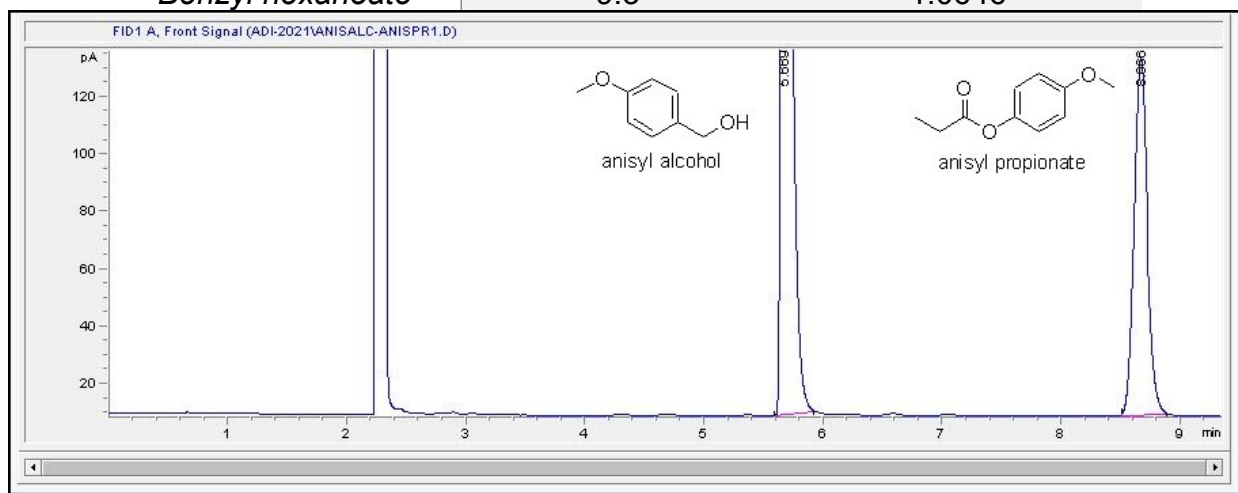

38

39 **Figure S1.** Chromatographic separation of anisyl alcohol and anisyl propionate.

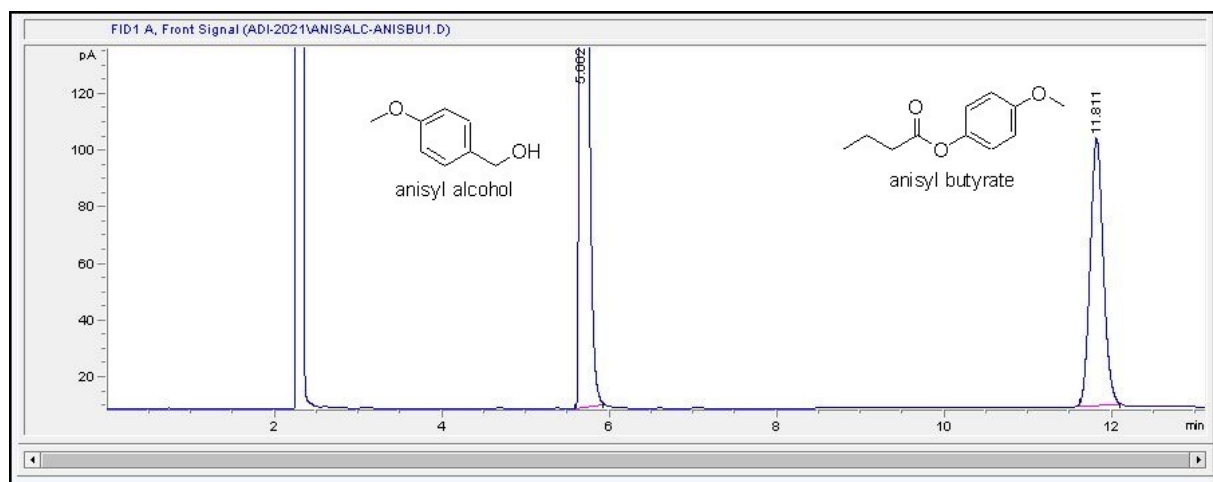

40

41 **Figure S2.** Chromatographic separation of anisyl alcohol and anisyl butyrate.

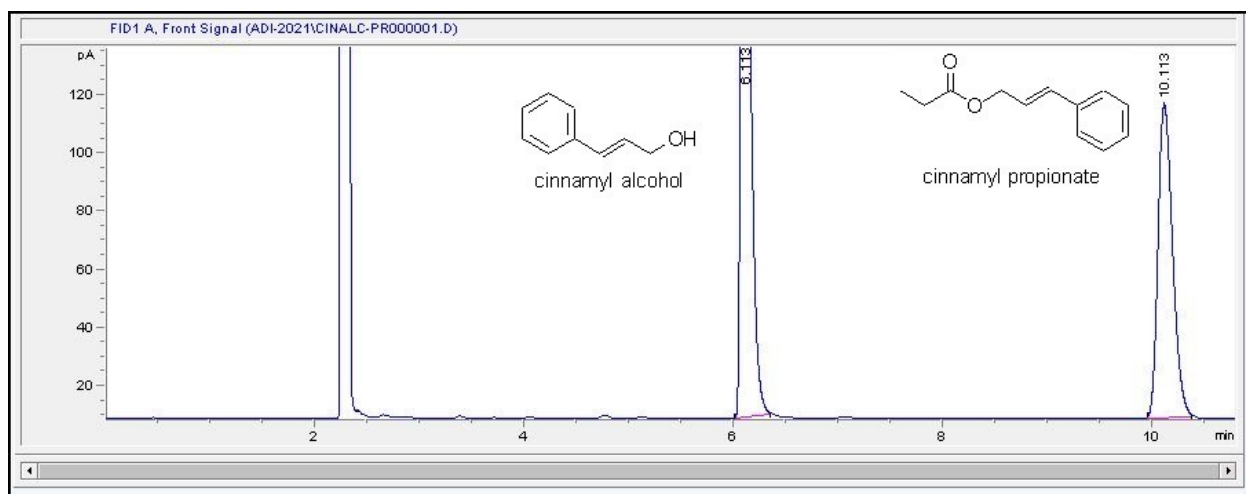

42  
43 **Figure S3.** Chromatographic separation of cinnamyl alcohol and cinnamyl propionate.

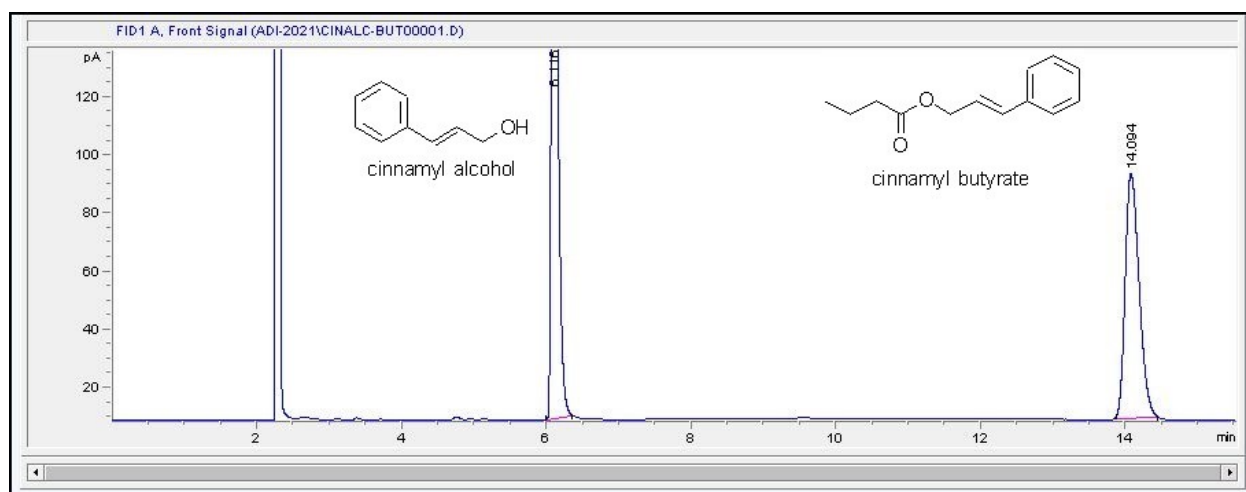

44  
45 **Figure S4.** Chromatographic separation of cinnamyl alcohol and cinnamyl butyrate.

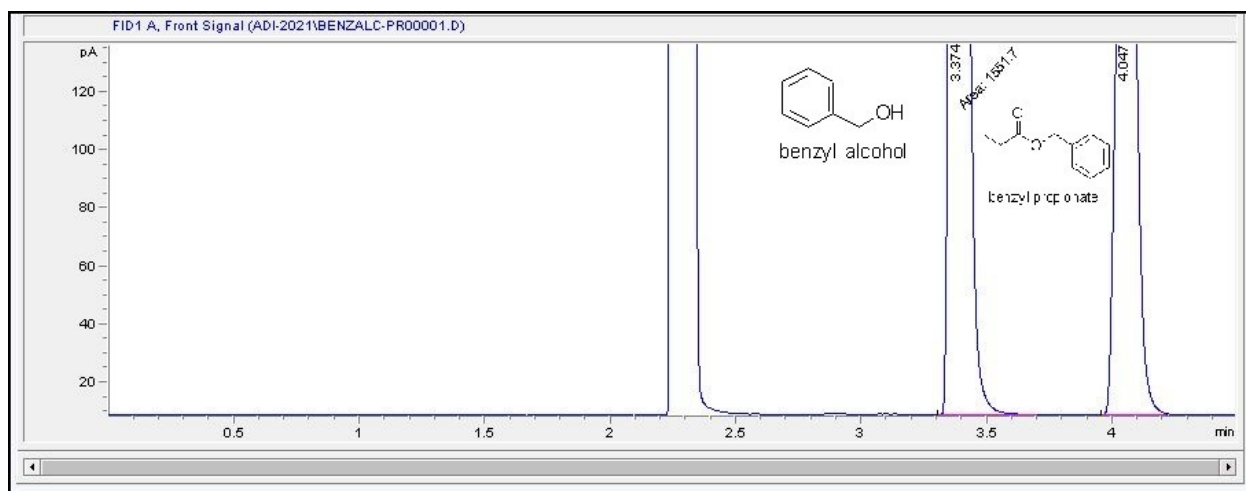

46  
47 **Figure S5.** Chromatographic separation of benzyl alcohol and benzyl propionate.

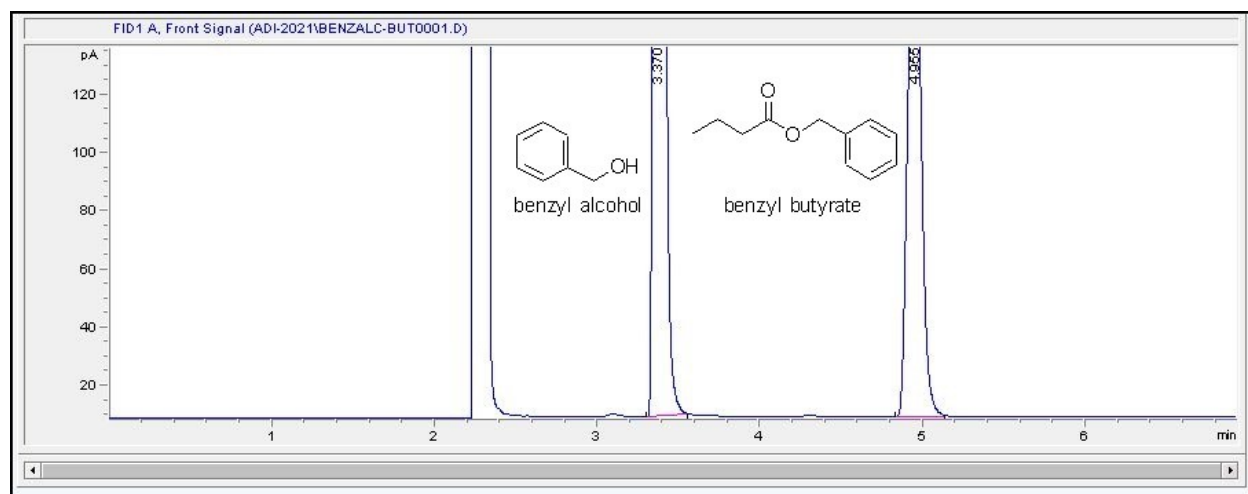

48  
49 **Figure S6.** Chromatographic separation of benzyl alcohol and benzyl butyrate.

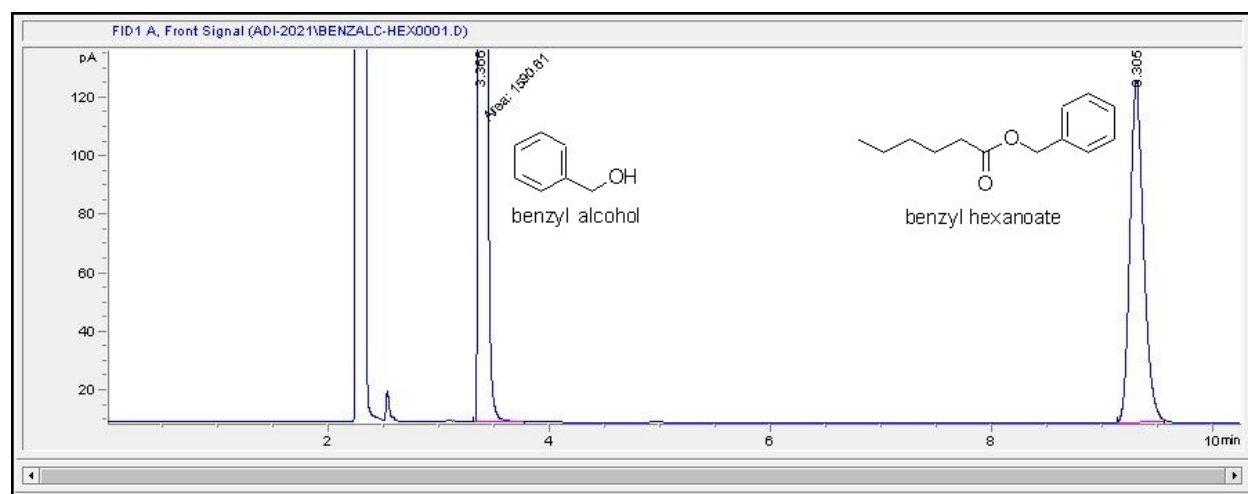

50  
51 **Figure S7.** Chromatographic separation of benzyl alcohol and benzyl hexanoate.

52  
53

#### 54 **Optimization of reaction system parameters by factorial design**

55 Reaction system parameters were optimized for each desired ester individually using a  
56 response surface methodology (central composite model). For this, four parameters (alcohol:  
57 acid molar *ratio*, temperature, vacuum and reaction time) were chosen for optimization. An  
58 experimental matrix was constructed in order to set-up the experiments, and it contained  
59 factorial points, axial points and center points. Factorial and center points were analyzed in  
60 duplicate. The matrix that was used for optimization experiments, with categorical values for  
61 each factor, is presented in **Table S2**. Please note that there are 32 factorial points because  
62 each factorial point was performed in duplicate.

63  
64

65 **Table S2.** Experimental matrix for optimizing reaction system parameters for the direct esterification of aromatic  
66 alcohols with short-chain acids.

| Sample no. | Type of sample | Molar ratio | Temperature [°C] | Vacuum [mbar] | Reaction time [min] |
|------------|----------------|-------------|------------------|---------------|---------------------|
| 1          | Factorial      | 1:1         | 25               | 15            | 30                  |
| 2          |                | 1:3         | 25               | 15            | 30                  |
| 3          |                | 1:1         | 35               | 15            | 30                  |
| 4          |                | 1:3         | 35               | 15            | 30                  |
| 5          |                | 1:1         | 25               | 25            | 30                  |
| 6          |                | 1:3         | 25               | 25            | 30                  |
| 7          |                | 1:1         | 35               | 25            | 30                  |
| 8          |                | 1:3         | 35               | 25            | 30                  |
| 9          |                | 1:1         | 25               | 15            | 90                  |
| 10         |                | 1:3         | 25               | 15            | 90                  |
| 11         |                | 1:1         | 35               | 15            | 90                  |
| 12         |                | 1:3         | 35               | 15            | 90                  |
| 13         |                | 1:1         | 25               | 25            | 90                  |
| 14         |                | 1:3         | 25               | 25            | 90                  |
| 15         |                | 1:1         | 35               | 25            | 90                  |
| 16         |                | 1:3         | 35               | 25            | 90                  |
| 17         |                | 1:1         | 25               | 15            | 30                  |
| 18         |                | 1:3         | 25               | 15            | 30                  |
| 19         |                | 1:1         | 35               | 15            | 30                  |
| 20         |                | 1:3         | 35               | 15            | 30                  |
| 21         |                | 1:1         | 25               | 25            | 30                  |
| 22         |                | 1:3         | 25               | 25            | 30                  |
| 23         |                | 1:1         | 35               | 25            | 30                  |
| 24         |                | 1:3         | 35               | 25            | 30                  |
| 25         |                | 1:1         | 25               | 15            | 90                  |
| 26         |                | 1:3         | 25               | 15            | 90                  |
| 27         |                | 1:1         | 35               | 15            | 90                  |
| 28         |                | 1:3         | 35               | 15            | 90                  |
| 29         |                | 1:1         | 25               | 25            | 90                  |
| 30         |                | 1:3         | 25               | 25            | 90                  |
| 31         |                | 1:1         | 35               | 25            | 90                  |
| 32         |                | 1:3         | 35               | 25            | 90                  |
| 33         | Axial          | 1:0.58      | 30               | 20            | 60                  |
| 34         |                | 1:3.4       | 30               | 20            | 60                  |
| 35         |                | 1:2         | 22.93            | 20            | 60                  |
| 36         |                | 1:2         | 37.07            | 20            | 60                  |
| 37         |                | 1:2         | 30               | 12.93         | 60                  |
| 38         |                | 1:2         | 30               | 27.07         | 60                  |
| 39         |                | 1:2         | 30               | 20            | 17.57               |
| 40         |                | 1:2         | 30               | 20            | 102.43              |
| 41         | Center         | 1:2         | 30               | 20            | 60                  |
| 42         |                | 1:2         | 30               | 20            | 60                  |
